# Supplementary material for: Optical coherence tomography angiography in preclinical Alzheimer’s disease
Source: PubMed Central journal article supplement — Br J Ophthalmol. 2019 May 22;104(2):157–61. doi: 10.1136/bjophthalmol-2019-314127 (PMC7025728; doi:10.1136/bjophthalmol-2019-314127), 2019-05-22
Supplement: bjophthalmol-2019-314127supp001.pdf [file bjophthalmol-2019-314127supp001.pdf]

Supplementary material “Optical Coherence Tomography Angiography in  
Preclinical Alzheimer’s Disease”

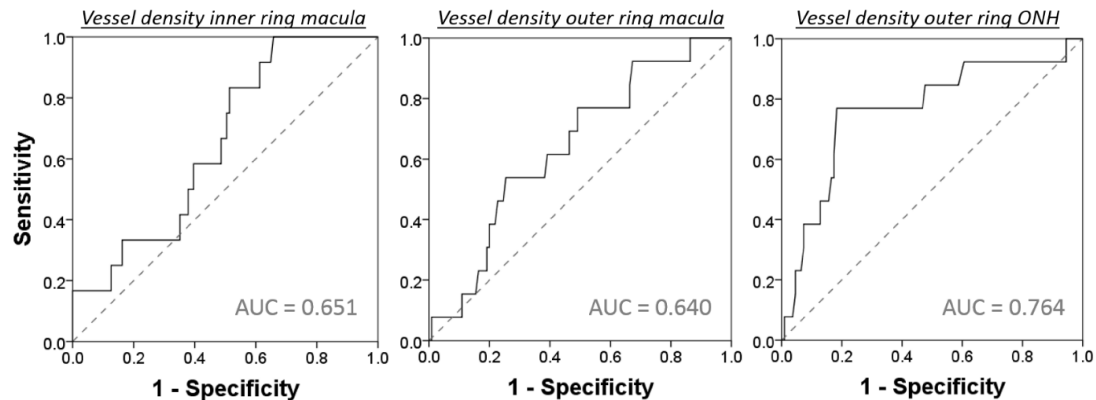

**Supplementary figure 1:** Receiver Operating Characteristic (ROC) curves for vessel density OCTA measures in predicting preclinical Alzheimer’s disease (i.e. positive visual rating score for amyloid-beta on PET). AUC = Area Under the Curve.

|                                          | Estimated marginal mean | p-value          | Raw overall p-value |
|------------------------------------------|-------------------------|------------------|---------------------|
| Retinal vessel density inner ring macula |                         |                  |                     |
| - Concordant negative (N=102)*           | 17.3                    | NA               | <b>0.009</b>        |
| - Discordant negative (N=7)              | 17.3                    | 0.918            |                     |
| - Discordant positive (N=8)              | <b>18.2</b>             | <b>0.001</b>     |                     |
| - Concordant positive (N=4)              | 17.6                    | 0.087            |                     |
| Retinal vessel density outer ring macula |                         |                  |                     |
| - Concordant negative (N=101)*           | 17.6                    | NA               | 0.101               |
| - Discordant negative (N=7)              | 17.4                    | 0.429            |                     |
| - Discordant positive (N=8)              | 18.0                    | 0.118            |                     |
| - Concordant positive (N=5)              | 18.1                    | 0.122            |                     |
| Retinal vessel density outer ring ONH    |                         |                  |                     |
| - Concordant negative (N=100)*           | 18.0                    | NA               | <b>&lt;0.001</b>    |
| - Discordant negative (N=7)              | 17.4                    | 0.521            |                     |
| - Discordant positive (N=8)              | 18.5                    | 0.157            |                     |
| - Concordant positive (N=5)              | <b>19.3</b>             | <b>&lt;0.001</b> |                     |

**Supplementary table 1:** twin post-hoc A $\beta$  load analyses with group means for retinal vessel densities in 3 regions. **Bold** p-values are significant at p<0.05. Obtained using GEE, corrected for age, gender, scan quality and diagnosis of diabetes. NA = not applicable, ONH = Optic Nerve Head. Groups with an asterisk (\*) were used as reference category in the analyses for obtaining the p-values in column 2.

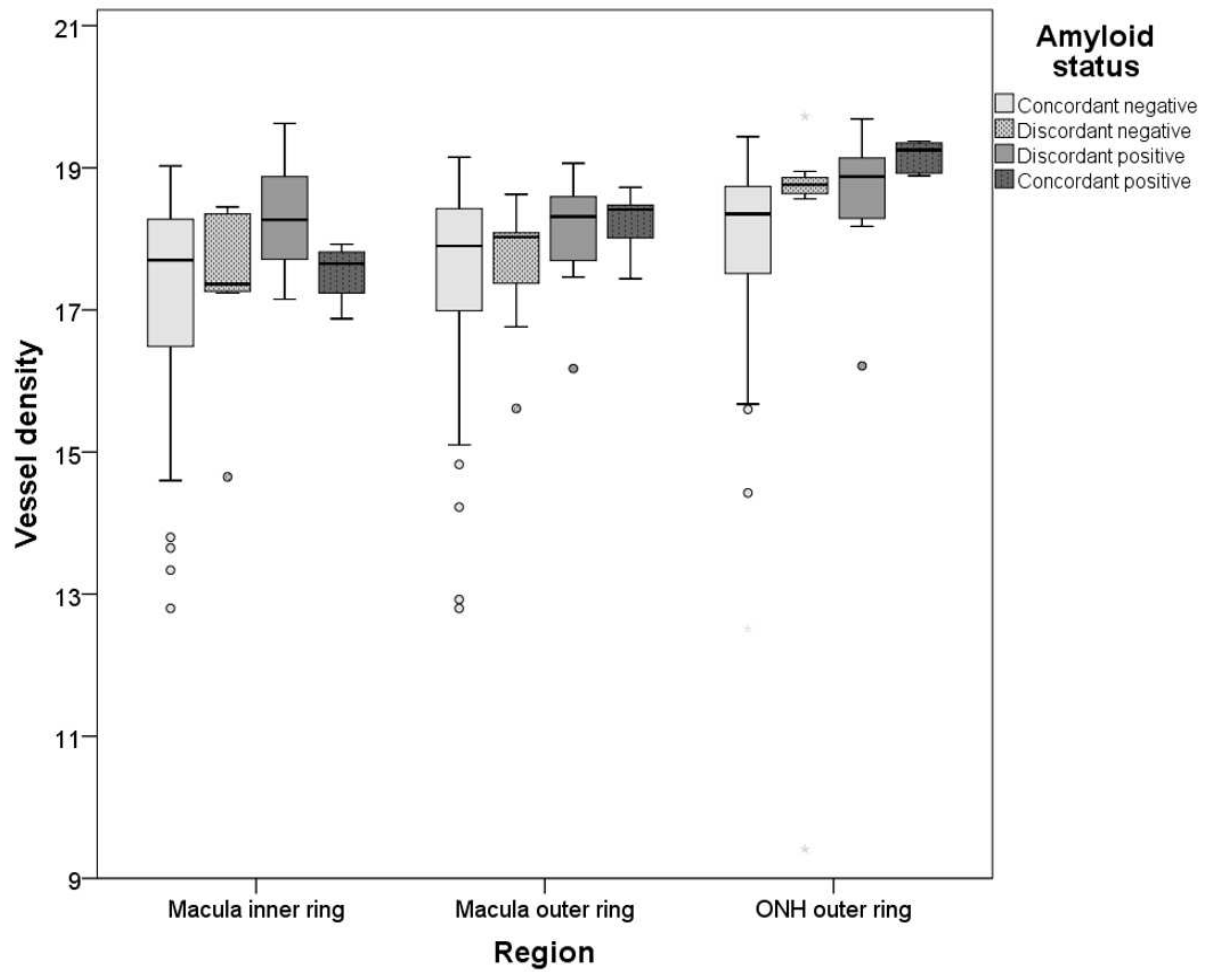

Supplementary figure 2: Boxplots for twin A $\beta$  load groups for retinal vessel densities in 3 regions.
